# Supplementary material for: Bridgmanite-Predominant Lower Mantle Evidenced from Velocity and Density Profiles across the 660-km Discontinuity
Source: Research Square preprint supplement (doi:10.21203/rs.3.rs-154057/v1), 2021-01-29
Supplement: Supplementary file 1 [file 70c5b77d59487049f9a654ca.docx]

Supplementary Information

**Bridgmanite-Predominant Lower Mantle Evidenced from Velocity and Density Profiles across the 660-km Discontinuity**

Suyu Fu1,*, Yanyao Zhang1, Takuo Okuchi2, Jung-Fu Lin1,*

1Department of Geological Sciences, Jackson School of Geosciences, The University of Texas at Austin, Austin, TX, USA

2Institute for Planetary Materials, Okayama University, Misasa, Japan

*Corresponding author: Jung-Fu Lin ([afu@jsg.utexas.edu](mailto:afu@jsg.utexas.edu)), Suyu Fu ([fsyxhy@gmail.com](mailto:fsyxhy@gmail.com))

**Supplementary Figure 1.** **High-pressure XRD results of single-crystal Fe10-Al14-Bgm.** **a** is the collected original XRD image on single-crystal Fe10-Al14-Bgmin a CCD cameraat ~76 GPa and 300 K and **b** is the corresponding integrated pattern. In **a**, diffraction peaks from the sample are marked with a small rectangle, and signals from neon pressure medium and diamonds are labeled with “neon” and “D”, respectively. Analyses of the XRD pattern indicate the loaded platelet has a crystallographic orientation of (-0.50, 0.05, -0.86). In **b**, Miller indices (hkl) of bridgmanite are labeled close to diffracted peaks. Average FWHM of these peaks are ~0.06°. Insert in **b** is a zoom-in region circled by a red rectangle in **a**, showing nice and round diffraction peaks. **c** shows unit cell volume of single-crystal Fe10-Al14-Bgm at high pressure and 300 K. Solid red circles are collected data of Fe10-Al14-Bgm in this study and red line is the best fit using third-order Birch-Murnaghan EoS. Black and blue lines are literature results on end member MgSiO3 bridgmanite4 and (Al,Fe)-bearing bridgmanite5 with a composition of Mg0.89Fe2+0.024Fe3+0.096Al0.11Si0.89O3 (Fe12-Al11-Bgm), respectively. The insert shows derived error ellipses of *K*0T and *K′*0T at the ±1σ level. The wavelength of incident X-ray beam is 0.3344 Å.





**Supplementary Figure 2.** **Sound velocities of single-crystal Fe10-Al14-Bgm as a function of azimuthal chi angles at high pressure.** **a,** 25.0 GPa. **b,** 54.4 GPa. **c,** 82.0 GPa. Black and red circles are experimentally measured sound velocities of two platelets with crystallographic orientations of (-0.50, 0.05, -0.86) and (0.65, -0.59, 0.48), respectively. Lines are the best fits to derive the full elastic tensor using Christoffel’s equations2. The two perpendicularly polarized shear wave velocities, *V*S2 and *V*S1, are plotted as solid and dashed lines for distinguishing.





**Supplementary Figure 3. Single-crystal elastic moduli of lower-mantle bridgmanite as a function of pressure.** Solid red circles are derived results of single-crystal Fe10-Al14-Bgm in this study, and solid red lines are the best fits using a finite-strain theory6. Literature results on bridgmanite with different compositions are plotted for comparisons. Dahsed black7, red3, blue8 lines are from *ab* *initio* calculations for MgSiO3 bridgmanite. Symbols are from experimenal measurements. Solid orange and blue circles1: Fe6-Al4-Bgm and Fe12-Al11-Bgm; open black circles9: Fe10-Al10-Bgm; solid olive circles: recalculated results by Lin et al.10 using velocity data of Kurnosov et al.9; open blue square11: MgSiO3 bridgmanite; solid black circles12: MgSiO3 bridgmanite. All experimental results are determined from BLS measurements except Fukui et al.12, which used inelastic x-ray scattering. Errors are smaller than symbols when not shown.





**Supplementary Figure 4. Elastic properties of bridgmanite with different Fe and Al contents at high pressure and 300 K. a,** *ρ*. **b,** *K*S. **c,** *μ*. **d,** Δ*ρ*/*ρ*. **e,** Δ*K*S/*K*S. **f,** Δ*μ*/*μ*. Symbols are experimental data in the literature4,5,15-21 and this study, and solid lines with corresponding colors are the best fits using third-order finite-strain equations6 that take Fe and Al effects into account. Particularly, solid red circles are single-crystal Fe10-Al14-Bgm data in this study. Legend in **a** is only for density data, whereas legends in **b** and **c** are shared for *K*S and *μ*. Uncertainties are smaller than symbols when not shown.





**Supplementary Figure 5.** **Modeling on thermoelastic properties of ferropericlase at high P-T**. **a** is density of ferropericlase with different Fe contents at high pressure and 300 K, while **b-d** are high P-T data. In **a**, symbols are experimental data22-27, and solid lines with corresponding colors are the best fits using Birch-Murnaghan EoS. A linear Fe effect on the density of ferropericlase is assumed. Detailed references are shown in the legend, in which numbers in parentheses right after “fp” indicate its Fe content in molar per cent. In **b-d**, symbols are high P-T elastic data of MgO (ref. 28), (Mg0.94Fe0.06)O (ref. 23), and (Mg0.75Fe0.25)O (ref. 27), and solid lines are the best fits using the fully internally-consistent thermoelastic model. Theoretical calculations29 on (Mg0.8125Fe0.1875)O ferropericlase are plotted as dashed black (300 K) and olive (2000 K) in **d** for comparisons. Uncertainties are smaller than symbols when not shown.





**Supplementary Figure 6.** **Modeling on thermoelastic parameters of CaSiO3 perovskite at high P-T. a** and **b-c** show high P-T elastic moduli (*K*S and *µ*) and density of CaSiO3 perovskite, respectively. Solid symbols in **a** and **b** are data from Gréaux et al.30, and solid lines are the best fits. Open circles in **a** and **b** are data from Thomson et al.31, which shows much lower shear moduli than those from Gréaux et al.30 and are not included in our fitting. **c** is thermal EoS of CaSiO3 perovskite32 up to 150 GPa and 2200 K, which is consistent with those by Gréaux et al.30 and is inclueded in our constraints. Dashed33 and dotted34 lines are results from theoretical calculations at 2000 K. Uncertainties are smaller than symbols when not shown.





**Supplementary Figure 7.** **Sensitivity of modeled high P-T *V*P, *V*S, and *ρ* of (Al,Fe)-bearing bridgmanite to variations of thermoelastic parameters.** **a,** *η*S0. **b,** *θ*0. **c,** *q*0. **d,** *γ*0. **e,** T. Fe and Al contents in bridgmanite along a geotherm are fixed as 10 mol% and 10 mol%, respectively, as a representative analysis. Reference values of these four parameters are taken based on analyses of literature experimental high P-T data3,6,35,36 and benchmarking from *ab* *initio* calculations3 (Supplementary Table 6). Perturbations of ±20%, ±30%, ±50%, ±40%, and ±10% are given to *η*S0, *θ*0, *q*0, *γ*0, and T, respectively, to cover their upper and lower bounds reported in the literature3,6,35,36. Variations in *V*P, *V*S, and *ρ* profiles are typically less than 0.6% with the given perturbations. Theoretical calculations3 for MgSiO3 bridgmanite at 2000 K are plotted for comparisons.





**Supplementary Figure 8. Velocity variations due to the frequency dependence of seismic attenuation as a function of the parameter *τ*.** Experimentally-measured velocities of bridgmanite and ferropericlase using BLS and ISLS are in GHz frequency range, while seismic observations have frequencies on the order of Hz. According to the literature37, calculations show that velocity variations due to attenuation from GHz to Hz are ~0.3% with the parameter *τ* as ~0.3, shown as the shaded orange area.


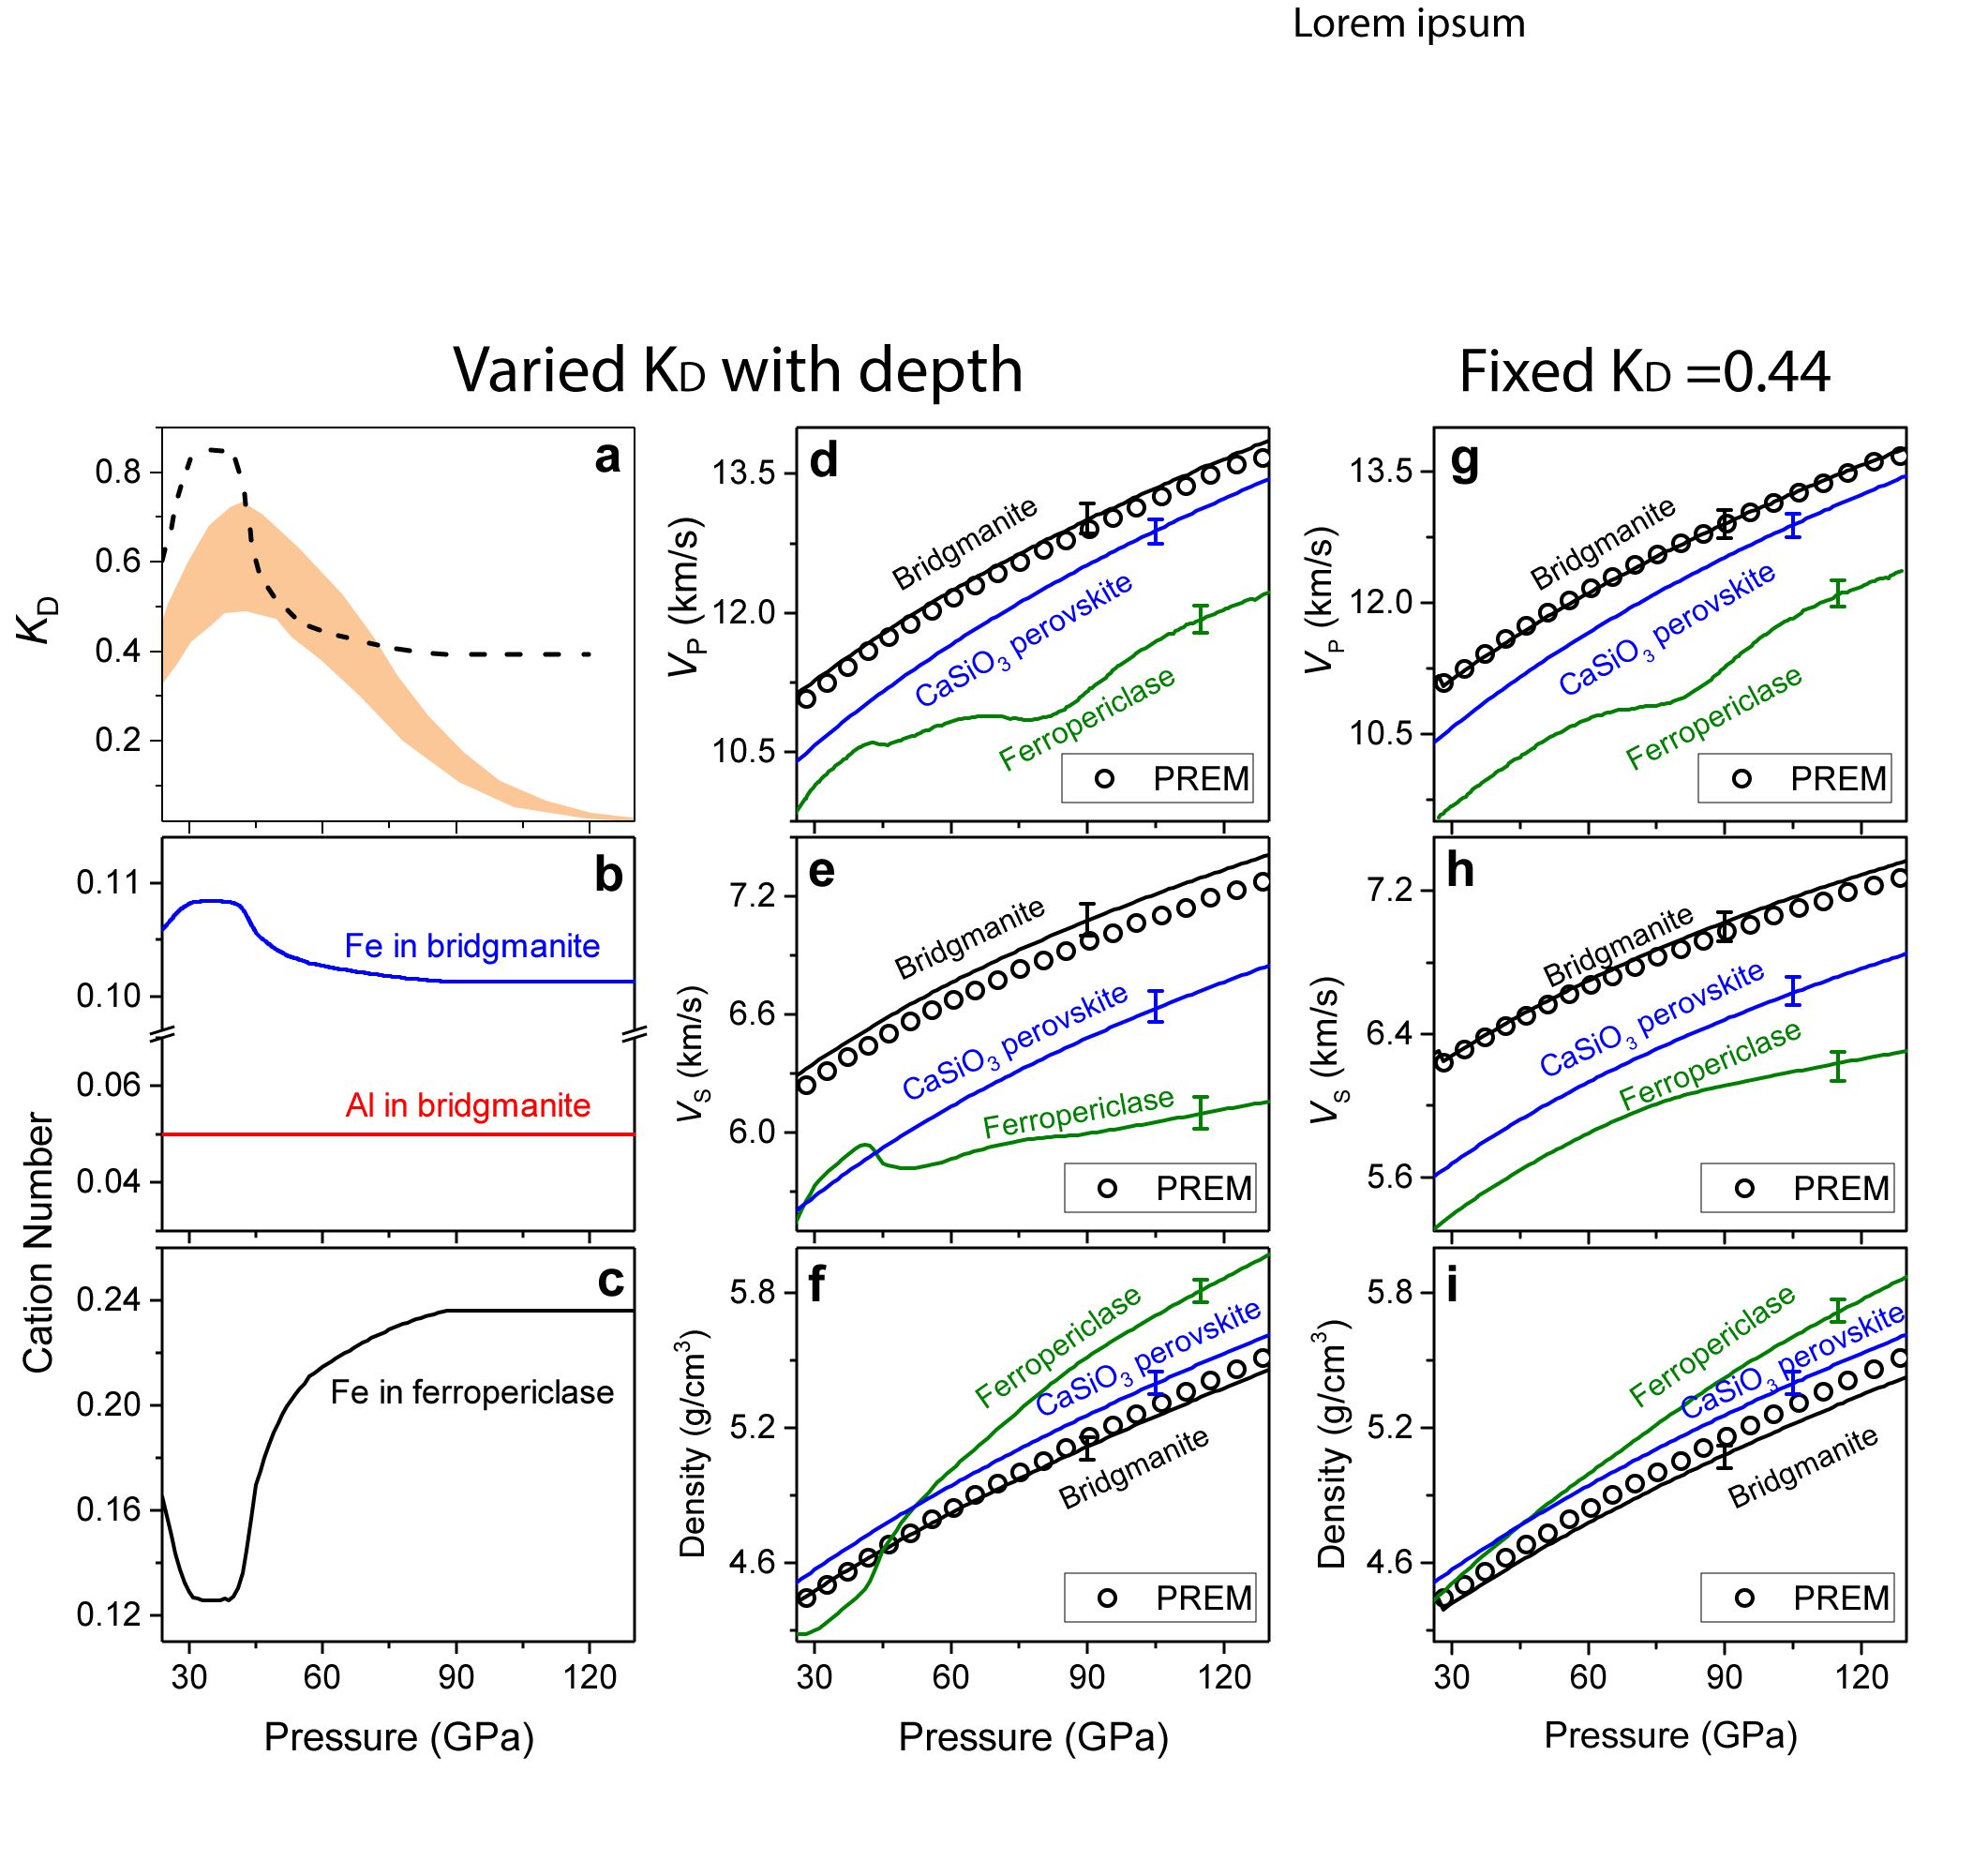


**Supplementary Figure 9. Lower-mantle mineralogy based on the best fits to PREM. a-f** show thebest fits by using varied *K*D with depth38, and **g-i** are the best fits with fixed *K*D as ~0.44. **a,** Fe partitioning coefficient (*K*D) between bridgmanite and ferropericlase as a function of depth from the literature38,39. Dashed black line is from experimental constraints38, which is used in our best-fit model, and shaded orange area is from a theoretical report40. **b and c,** Variations of Fe and/or Al contents in bridgmanite and ferropericlase with depth. **d,** *V*P, **e,** *V*S, and **f,** *ρ* of individual minerals along an adiabatic geotherm with varied *K*D with depth38 (refer to Figs. 2-3). **g,** *V*P, **h,** *V*S, and **i,** *ρ* of individual minerals along an adiabatic geotherm with fixed *K*D as ~0.44. Velocity and density profiles of (Al,Fe)-bearing bridgmanite, ferropericlase, and Ca-perovskite are plotted as solid black, olive, and blue lines, respectively. PREM profiles41 are plotted as open circles. The value of *K*D affect little on our conclusion that the lower mantle is bridgmanite-predominant (Supplementary Table 6, and Supplementary Fig. 13).


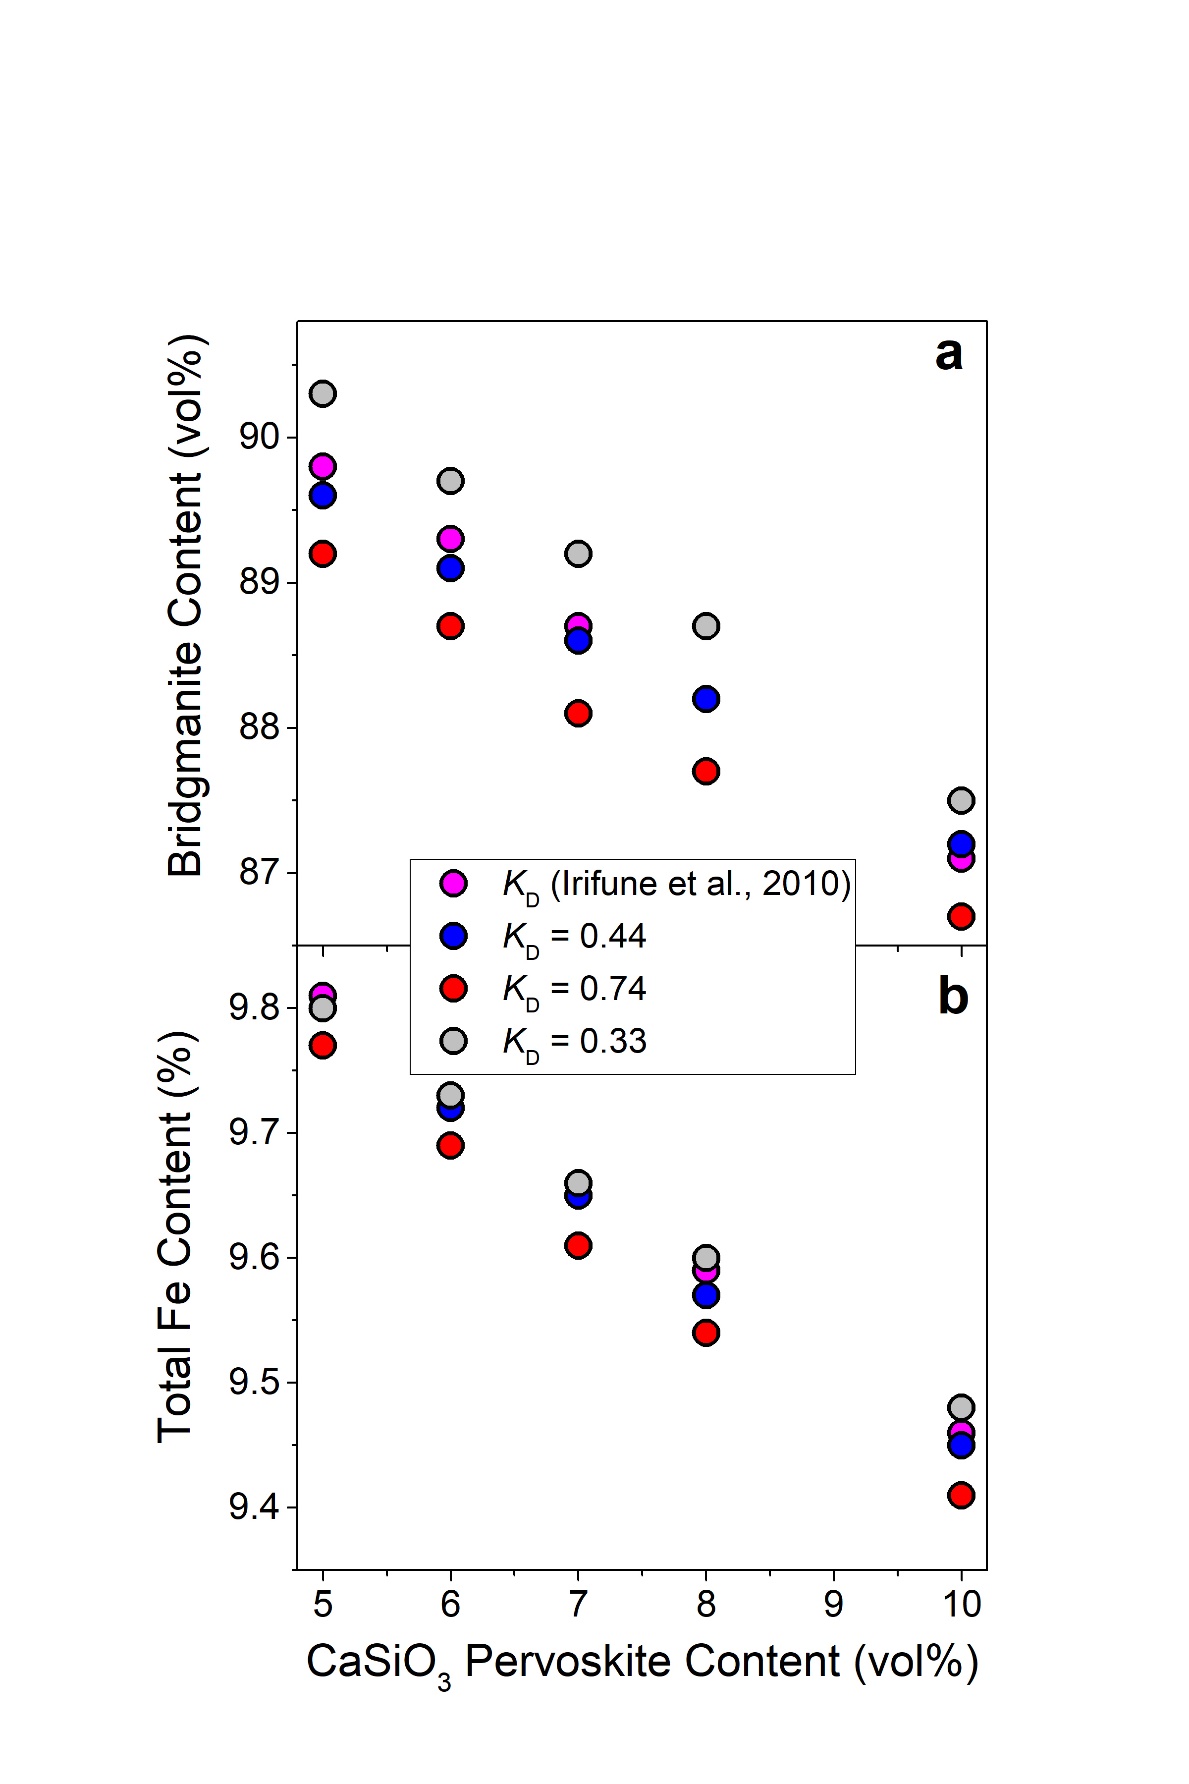


**Supplementary Figure 10. Trade-offs between volume and compositional parameters on deriving the lower-mantle mineralogy and adiabatic geotherm. a,** Contents of bridgmanite versus CaSiO3 perovskite. **b,** Total Fe content versus content of CaSiO3 perovskite. Pink circles are our best-fit model, which uses changing *K*D with depth38. Blue, red, and gray circles are results with fixed *K*D of 0.44, 0.74, and 0.33, respectively (Supplementary Table 7). These *K*D values are chosen to cover its range of literature reports38.





**Supplementary Figure 11.** **Modeling on thermoelastic parameters of transition-zone minerals at high P-T. a**-**b** and **c-d** are modeling for (Mg0.91Fe0.09)2SiO4 ringwoodite42 and majoritic garnet43 with a composition of pyrolite minus olivine, respectively. Solid circles are experimental high P-T data from the literature42,43, and solid lines are the best fits using the fully internally-consistent thermoelastic model6. **a** and **b** share the legend, and **c** and **d** share the legend. Uncertainties are smaller than symbols when not shown.





**Supplementary Figure 12. Velocity and density profiles across the 660-km discontinuity.** Dashed black41 and red44 lines are from 1D seismic profiles. Solid circles are mineral physics models for a chemically homogeneous whole mantle. Three candidate whole-mantle compositional models are considered. Black circles: peridotite45 with ~80 vol% ringwoodite and ~20 vol% majoritic garnet (Mg/Si=~1.5); red circles: pyrolite46 with ~60 vol% ringwoodite and ~40 vol% majoritic garnet (Mg/Si=~1.25); olive circles: piclogite47,48 with ~20 vol% ringwoodite and ~80 vol% majoritic garnet (Mg/Si=~0.9). Thermoelastic parameters for high P-T modeling of majoritic garnet and ringwoodite are derived from refits to literature data42,43 using the thermoelastic model6 (Supplementary Table 6 and Supplementary Fig. 14). The gradual transformation of majoritic garnet at high P-T is taken from the literature49. Vertical black ticks show representative standard uncertainties (±1σ) of modeled*V*P, *V*S, and*ρ* of mineral aggregates.





**Supplementary Figure 13. Lower-mantle bulk viscosity as a function of volume fraction of ferropericlase.** Viscosities of bridgmanite and ferropericlase are shown as shaded blue and green areas, respectively, from the literature50. Solid and dashed lines represent modeled lower-mantle viscosities using “inter-connected weak layers” (IWL) and “load bearing framework” (LBF) models51, respectively. Solid red and olive circles show estimated viscosities for a bridgmanite-predominant and pyrolitic lower mantle, respectively.

**Supplementary Table 1. Lattice parameters and unit cell volume of single-crystal Fe10-Al14-Bgm at high pressure.**

| Au | | Fe10-Al14-Bgm | | | |
| --- | --- | --- | --- | --- | --- |
| Pressure (GPa) | *a* (Å) | *a* (Å) | *b* (Å) | *c* (Å) | *V* (Å3) |
| ambient |  | 4.7875(2) | 4.9423(2) | 6.9205(2) | 163.75(1) |
| 4.3(1) | 4.0463(3) | 4.7601(2) | 4.9122(2) | 6.8873(2) | 161.04(1) |
| 5.9(1) | 4.0348(3) | 4.7526(2) | 4.9056(2) | 6.8776(2) | 160.35(1) |
| 7.4(1) | 4.0253(3) | 4.7375(2) | 4.9029(2) | 6.8544(2) | 159.21(1) |
| 9.0(1) | 4.0151(3) | 4.7282(2) | 4.8971(2) | 6.8410(2) | 158.40(2) |
| 10.4(1) | 4.0064(3) | 4.7244(2) | 4.8868(2) | 6.8269(3) | 157.62(2) |
| 12.8(1) | 3.9930(3) | 4.7131(2) | 4.8805(2) | 6.8099(3) | 156.64(2) |
| 14.8(1) | 3.9820(3) | 4.7023(3) | 4.8745(2) | 6.7969(3) | 155.79(2) |
| 16.1(1) | 3.9750(3) | 4.6967(3) | 4.8638(2) | 6.7845(3) | 154.98(2) |
| 17.1(1) | 3.9701(3) | 4.6952(3) | 4.8599(2) | 6.7782(3) | 154.67(2) |
| 18.3(1) | 3.9640(3) | 4.6897(3) | 4.8538(2) | 6.7720(3) | 154.15(2) |
| 19.6(1) | 3.9573(3) | 4.6821(3) | 4.8483(2) | 6.7640(3) | 153.54(3) |
| 19.8(1) | 3.9564(3) | 4.6812(3) | 4.8455(2) | 6.7605(3) | 153.35(3) |
| 21.9(1) | 3.9464(3) | 4.6744(3) | 4.8403(3) | 6.7436(3) | 152.58(3) |
| 22.9(1) | 3.9418(3) | 4.6678(3) | 4.8357(3) | 6.7390(3) | 152.11(3) |
| 25.3(1) | 3.9313(3) | 4.6623(3) | 4.8143(3) | 6.7239(3) | 150.92(3) |
| 26.8(1) | 3.9249(3) | 4.6562(3) | 4.8113(3) | 6.7136(4) | 150.40(4) |
| 27.6(2) | 3.9217(4) | 4.6485(3) | 4.8034(3) | 6.7061(4) | 149.74(4) |
| 29.2(2) | 3.9150(4) | 4.6406(3) | 4.7962(3) | 6.6985(4) | 149.09(4) |
| 30.8(2) | 3.9086(4) | 4.6316(3) | 4.7906(3) | 6.6894(4) | 148.42(4) |
| 32.1(2) | 3.9036(5) | 4.6364(3) | 4.7873(3) | 6.6709(4) | 148.06(4) |
| 33.8(2) | 3.8969(6) | 4.6143(3) | 4.7812(3) | 6.6660(4) | 147.06(5) |
| 35.1(2) | 3.8920(6) | 4.6204(4) | 4.7689(3) | 6.6555(4) | 146.65(5) |
| 37.3(2) | 3.8840(6) | 4.5977(4) | 4.7574(3) | 6.6488(5) | 145.50(5) |
| 38.6(3) | 3.8797(7) | 4.5989(4) | 4.7566(3) | 6.6374(5) | 145.19(5) |
| 40.3(3) | 3.8736(8) | 4.5913(4) | 4.7502(3) | 6.6246(5) | 144.48(5) |
| 42.4(3) | 3.8664(9) | 4.5813(4) | 4.7412(3) | 6.6110(5) | 143.59(5) |
| 43.9(3) | 3.8617(9) | 4.5848(4) | 4.7477(3) | 6.5905(5) | 143.46(6) |
| 45.2(4) | 3.857310) | 4.5800(4) | 4.7424(4) | 6.5850(5) | 143.03(6) |
| 47.6(4) | 3.8498(10) | 4.5676(4) | 4.7356(4) | 6.5691(5) | 142.09(6) |
| 49.4(4) | 3.8443(10) | 4.5645(4) | 4.7286(4) | 6.5622(5) | 141.64(6) |
| 50.8(4) | 3.8398(11) | 4.5562(5) | 4.7266(4) | 6.5574(5) | 141.22(6) |
| 52.7(4) | 3.8344(10) | 4.5494(5) | 4.7102(4) | 6.5396(6) | 140.13(6) |
| 54.8(4) | 3.8281(11) | 4.5464(5) | 4.7109(4) | 6.5382(6) | 140.03(6) |
| 56.9(5) | 3.8222(11) | 4.5358(5) | 4.7042(4) | 6.5410(6) | 139.57(6) |
| 58.4(5) | 3.8181(11) | 4.5236(5) | 4.7000(4) | 6.5314(6) | 138.86(7) |
| 59.9(5) | 3.8141(11) | 4.5225(6) | 4.6956(4) | 6.5266(6) | 138.60(7) |
| 61.5(5) | 3.8097(11) | 4.5172(6) | 4.6938(5) | 6.5205(6) | 138.26(7) |
| 63.1(5) | 3.8053(11) | 4.5080(6) | 4.6910(5) | 6.5163(6) | 137.80(7) |
| 65.7(4) | 3.7987(10) | 4.4973(6) | 4.6823(5) | 6.5091(6) | 137.07(7) |
| 67.0(5) | 3.7954(10) | 4.4877(6) | 4.6814(5) | 6.5046(6) | 136.66(7) |
| 68.9(5) | 3.7907(10) | 4.4701(6) | 4.6766(5) | 6.4994(7) | 135.87(7) |
| 71.1(5) | 3.7853(11) | 4.4719(6) | 4.6700(5) | 6.4887(7) | 135.51(7) |
| 72.6(5) | 3.7816(11) | 4.4567(6) | 4.6661(5) | 6.4810(7) | 134.78(7) |

**Supplementary Table 2. Specific heat capacity of polycrystalline ferropericlase and bridgmanite at ambient pressure**

| T  (K) | *C*P (J/mol/K) | T  (K) | *C*P (J/mol/K) | T  (K) | *C*P (J/mol/K) | T  (K) | *C*P (J/mol/K) |
| --- | --- | --- | --- | --- | --- | --- | --- |
| **Fe-bearing Bridgmanite**  (Mg0.96Fe0.05Si0.99O3) | | | | | | **Ferropericlase**  (Mg0.8Fe0.2O) | |
| 2.11 | 0.06 | 101.71 | 18.16 | 201.42 | 55.21 | 307.48 | 39.26 |
| 5.06 | 0.08 | 104.74 | 19.30 | 204.44 | 56.22 | 312.53 | 39.63 |
| 8.07 | 0.10 | 107.76 | 20.45 | 207.44 | 57.31 | 317.56 | 39.95 |
| 11.10 | 0.14 | 110.79 | 21.41 | 210.46 | 58.22 | 322.60 | 40.25 |
| 14.12 | 0.19 | 113.81 | 22.45 | 213.49 | 59.01 | 327.64 | 40.54 |
| 17.15 | 0.25 | 116.83 | 23.57 | 216.51 | 59.79 | 332.67 | 40.83 |
| 20.17 | 0.31 | 119.86 | 24.78 | 219.53 | 60.82 | 337.72 | 41.07 |
| 23.19 | 0.37 | 122.88 | 25.95 | 222.55 | 61.76 | 342.76 | 41.27 |
| 26.21 | 0.46 | 125.91 | 27.16 | 225.65 | 62.21 | 347.80 | 41.59 |
| 29.23 | 0.57 | 128.92 | 28.35 | 228.60 | 63.19 | 352.82 | 41.86 |
| 32.25 | 0.73 | 131.94 | 29.49 | 231.61 | 64.25 | 357.85 | 42.09 |
| 35.26 | 0.93 | 134.97 | 30.68 | 234.63 | 65.37 | 362.86 | 42.31 |
| 38.28 | 1.19 | 137.97 | 32.09 | 237.65 | 66.29 | 367.90 | 42.50 |
| 41.30 | 1.51 | 141.01 | 33.05 | 240.68 | 67.02 | 372.88 | 42.75 |
| 44.32 | 1.89 | 144.03 | 34.19 | 243.69 | 67.73 | 377.90 | 42.94 |
| 47.34 | 2.33 | 147.06 | 35.35 | 246.71 | 68.35 | 382.93 | 43.15 |
| 50.37 | 2.83 | 150.08 | 36.50 | 249.73 | 68.95 | 387.94 | 43.33 |
| 53.39 | 3.41 | 153.11 | 37.67 | 252.75 | 69.68 | 392.96 | 43.49 |
| 56.41 | 4.03 | 156.13 | 38.82 | 255.77 | 70.37 | 398.01 | 43.65 |
| 59.43 | 4.71 | 159.16 | 39.99 | 258.78 | 71.05 |  |  |
| 62.44 | 5.43 | 162.16 | 41.16 | 261.80 | 71.75 |  |  |
| 65.46 | 6.21 | 165.18 | 42.29 | 264.82 | 72.47 |  |  |
| 68.49 | 7.03 | 168.20 | 43.43 | 267.83 | 73.11 |  |  |
| 71.51 | 7.89 | 171.22 | 44.54 | 270.85 | 73.71 |  |  |
| 74.53 | 8.77 | 174.22 | 45.84 | 273.87 | 74.18 |  |  |
| 77.56 | 9.71 | 177.24 | 46.96 | 276.88 | 74.68 |  |  |
| 80.58 | 10.68 | 180.25 | 48.05 | 279.88 | 75.31 |  |  |
| 83.60 | 11.70 | 183.27 | 49.10 | 282.89 | 76.37 |  |  |
| 86.62 | 12.71 | 186.29 | 50.17 | 285.89 | 77.78 |  |  |
| 89.64 | 13.73 | 189.32 | 51.24 | 288.90 | 78.38 |  |  |
| 92.66 | 14.81 | 192.34 | 52.23 | 291.91 | 80.08 |  |  |
| 95.68 | 15.90 | 195.37 | 53.24 | 294.93 | 79.17 |  |  |
| 98.71 | 17.01 | 198.39 | 54.26 | 297.96 | 78.34 |  |  |

**Supplementary Table 3. Elastic moduli of single-crystal Fe10-Al14-Bgm at high pressures. Errors in parentheses are standard deviation (±1σ) from error propagation analyses.**

| Pressure (GPa) | 25.0(3) | 35.0(5) | 45.0(5) | 54.4(6) | 65.8(8) | 70.4(7) | 76.0(9) | 82.0(14) |
| --- | --- | --- | --- | --- | --- | --- | --- | --- |
| *C11* (GPa) | 542(9) | 596(15) | 654(15) | 693(16) | 743(16) | 760(15) | 773(17) | 800(23) |
| *C22* (GPa) | 653(3) | 697(5) | 740(4) | 791(5) | 829(4) | 852(5) | 860(6) | 868(8) |
| *C33* (GPa) | 598(9) | 636(13) | 687(14) | 744(15) | 793(14) | 839(16) | 895(18) | 922(22) |
| *C44* (GPa) | 207(2) | 223(3) | 246(2) | 256(3) | 276(2) | 279(3) | 295(5) | 306(6) |
| *C55* (GPa) | 213(5) | 221(7) | 235(6) | 242(6) | 246(7) | 250(9) | 249(10) | 258(12) |
| *C66* (GPa) | 235(3) | 253(3) | 270(3) | 285(4) | 299(3) | 303(4) | 311(4) | 316(5) |
| *C12* (GPa) | 162(5) | 186(3) | 198(5) | 204(6) | 218(5) | 225(6) | 227(6) | 229(5) |
| *C13* (GPa) | 192(4) | 212(6) | 224(6) | 250(5) | 245(5) | 264(7) | 278(8) | 280(9) |
| *C23* (GPa) | 225(5) | 247(8) | 260(8) | 290(12) | 329(10) | 340(13) | 376(14) | 390(20) |
| *KS*  (GPa) | 326(4) | 356(5) | 382(6) | 412(6) | 437(8) | 455(8) | 473(9) | 485(11) |
| *µ*  (GPa) | 211(2) | 224(2) | 242(2) | 254(2) | 268(3) | 273(3) | 279(4) | 287(5) |
| *ρ* (g/cm3) | 4.56(1) | 4.71(1) | 4.83(1) | 4.94(2) | 5.05(2) | 5.10(2) | 5.16(2) | 5.21(3) |
| *VP* (km/s) | 11.52(8) | 11.80(8) | 12.08(10) | 12.33(11) | 12.54(12) | 12.67(13) | 12.79(14) | 12.90(16) |
| *VS* (km/s) | 6.79(4) | 6.90(4) | 7.09(5) | 7.18(5) | 7.28(5) | 7.32(5) | 7.35(6) | 7.42(6) |

**Supplementary Table 4. Pressure derivatives of *Cij* for single-crystal Fe10-Al14-Bgm at ambient conditions using a finite-strain theory.**

| *ij* | *Cij*0 (GPa) | *C’ij*0 |  | *M*0 (GPa) | *M’*0 |
| --- | --- | --- | --- | --- | --- |
| 11 | 425(13) | 5.75(9) | Vogit bound | | |
| 22 | 538(6) | 5.64(14) | *KVS*0 | 245.5(27) | 3.56(6) |
| 33 | 425(18) | 6.88(28) | *µVS*0 | 170.7(13) | 1.90(2) |
| 44 | 159(3) | 2.15(6) | *Reuss bound* | | |
| 55 | 187(5) | 1.41(5) | *KRS*0 | 245.8(17) | 3.50(4) |
| 66 | 195(2) | 2.02(4) | *µRS*0 | 170.0(15) | 1.87(2) |
| 12 | 134(4) | 1.62(7) | *Voigt-Reuss-Hill average* | | |
| 13 | 151(6) | 1.97(10) | *KVRHS*0 | 245.7(30) | 3.53(5) |
| 23 | 140(8) | 3.17(12) | *µVRHS*0 | 170.4(14) | 1.88(2) |

**Supplementary Table 5.** **Comparisons of bulk and shear moduli of bridgmanite and their pressure derivatives at room temperature**

| **Brillouin Light Scattering** | **Composition** | ***K*S0 (GPa)** | ***μ0* (GPa)** | ***K′*S0** | ***μ′*0** |
| --- | --- | --- | --- | --- | --- |
| This study | Mg0.93Fe3+0.048Fe2+0.032Al0.10Si0.90O3 | 248(4) | 164(2) | 3.69(8) | 1.85(6) |
| Fu et al.52 | Mg0.96(1)Fe2+0.036(5)Fe3+0.014(5)Si0.99(1)O3 (<42.6 GPa) | 254(8) | 166.2(5) | 3.3(3) | 1.91(2) |
| Fu et al.52 | Mg0.96(1)Fe2+0.036(5)Fe3+0.014(5)Si0.99(1)O3 (> 58 GPa) | 234(11) | 190.0(7) | 3.5(4) | 1.54(11) |
| Jackson et al.18 | Al-Bgm (5.1 wt.% Al2O3) | 252(5) | 165(2) | 3.7(3) | 1.7(2) |
| Murakami et al.20 | MgSiO3 |  | 172.9(2) |  | 1.56(4) |
| Murakami et al.53 | Al-Bgm (4 wt.% Al2O3) |  | 166(1) |  | 1.57(5) |
| Kurnosov et al.19 | (Mg0.9Fe0.1 Al0.1Si0.9)O3 | 250.8(4) | 159.7(2) | 3.44(3) | 2.05(2) |
| **Ultrasonic Interferometry** | **Composition** | ***KS0* (GPa)** | ***μ0* (GPa)** | ***K′*S0** | ***μ′*0** |
| Li and Zhang21 | MgSiO3 | 253(2) | 173(1) | 4.4(1) | 2.0(1) |
| Chantel et al.15 | MgSiO3 | 247(4) | 176(2) | 4.5(2) | 1.6(1) |
| Chantel et al.15 | (Mg0.95Fe0.05)SiO3 | 236(2) | 174(1) | 4.7(1) | 1.56(5) |
| **X-Ray Diffraction** | **Composition** | ***KT0* (GPa)** |  | ***K′*T0** |  |
| This study | Mg0.93Fe3+0.048Fe2+0.032Al0.10Si0.90O3 |  |  |  |  |
| Fu et al.52 | Mg0.96(1)Fe2+0.036(5)Fe3+0.014(5)Si0.99(1)O3 (<40 GPa) | 258(1) |  | 4 (fixed) |  |
| Fu et al.52 | Mg0.96(1)Fe2+0.036(5)Fe3+0.014(5)Si0.99(1)O3 (>60 GPa) | 252(2) |  | 4 (fixed) |  |
| Chantel et al.15 | MgSiO3 | 257(2) |  | 4 (fixed) |  |
| Chantel et al.15 | (Mg0.95Fe0.05)SiO3 | 246(2) |  | 4 (fixed) |  |
| Boffa Ballaran et al.4 | MgSiO3 | 251(2) |  | 4.11(7) |  |
| Boffa Ballaran et al.4 | (Mg0.95Fe0.05)SiO3 | 253(3) |  | 3.99(7) |  |
| Boffa Ballaran et al.4 | (Mg0.6Fe0.4)( Al0.36Si0.62)O3 | 240(2) |  | 4.12(8) |  |
| Mao et al.5 | (Mg0.94Fe0.06) (Al0.01Si0.99)O3 | 255(2) |  | 4 (fixed) |  |
| Mao et al.5 | (Mg0.89Fe0.11) (Al0.11Si0.89)O3 | 264(2) |  | 4 (fixed) |  |

**Supplementary Table 6.** **Thermoelastic parameters of mantle minerals for high P-T modeling**

|  | *V*0 (Å3) | *K*0 (GPa) | *K′*0 | *μ*0 (GPa) | *μ′*0 | *θ*0 | *γ*0 | *q*0 | *η*S0 |
| --- | --- | --- | --- | --- | --- | --- | --- | --- | --- |
| a(Al,Fe)-bearing Bridgmanite | - | - | - | - | - | 900 | 1.57 | 1.1 | 2.4 |
| aFerropericlase  (HS) | - | - | - | - | - | 760 | 1.4 | 1.2 | 2.6 |
| aFerropericlase (LS) | - | - | - | - | - | 760 | 1.4 | 0.3 | 2.6 |
| bCaSiO3 perovskite30 | 45.4 | 248 | 4 | 126 | 1.6 | 1000 | 1.42 | 2.65 | 1.54 |
| bRingwoodite42 | 525 | 188 | 4.22 | 118.7 | 1.28 | 820 | 1.02 | 0.39 | 2.07 |
| bMajoritic garnet43 | 1528.82 | 159.7 | 4.52 | 93.2 | 1.3 | 700 | 0.79 | -0.81 | 1.29 |

aSee details in Methods for Fe and/or Al effects on *V*0, *K*0, *K′*0, *μ*0, and *μ′*0 of (Al,Fe)-bearing bridgmanite and ferropericlase.Values of *θ*0, *q*0, *γ*0, and *η*S0 for (Al,Fe)-bearing bridgmanite and ferropericlase are constrained by benchmarking from literature experimental data together with *ab initio* calculations3,6,27,35,36,54,55.

bThermoelastic parameters for CaSiO3 perovskite, ringwoodite, and majoritic garnet are derived by refitting literature data30,42,43 with the model6.

**Supplementary Table 7. *K*D effect on the derived lower-mantle mineralogy**

| Best fits | Model I | Model II | Model III | Model IV |
| --- | --- | --- | --- | --- |
| *K*D value (**fixed**) | Irifune et al.38 | 0.74 | 0.44 | 0.33 |
| Total Fe content (at%) | 9.65 | 9.61 | 9.65 | 9.70 |
| Al content in Bridgmanite (at%) | 5.2 | 5.1 | 5.2 | 5.3 |
| Bridgmanite (vol%) | 88.7 | 88.1 | 88.6 | 89.2 |
| Ferropericlase (vol%) | 4.3 | 4.9 | 4.4 | 3.8 |
| Ca-bearing perovskite (vol%, **fixed**) | 7.0 | 7.0 | 7.0 | 7.0 |

**References**

1 Fu, S. *et al.* Single-crystal elasticity of (Al,Fe)-bearing bridgmanite and seismic anisotropy at the topmost lower mantle. *Earth Planet Sc Lett* **518**, 116-126 (2019).

2 Every, A. G. General Closed-Form Expressions for Acoustic-Waves in Elastically Anisotropic Solids. *Phys Rev B* **22**, 1746-1760, doi:DOI 10.1103/PhysRevB.22.1746 (1980).

3 Wentzcovitch, R., Karki, B., Cococcioni, M. & De Gironcoli, S. Thermoelastic Properties of MgSiO3-Perovskite: Insights on the Nature of the Earth’s Lower Mantle. *Phys Rev Lett* **92**, 018501 (2004).

4 Boffa Ballaran, T. *et al.* Effect of chemistry on the compressibility of silicate perovskite in the lower mantle. *Earth Planet Sc Lett* **333**, 181-190, doi:10.1016/j.epsl.2012.03.029 (2012).

5 Mao, Z. *et al.* Equation of state and hyperfine parameters of high-spin bridgmanite in the Earth’s lower mantle by synchrotron X-ray diffraction and Mössbauer spectroscopy. *Am Mineral* **102**, 357-368 (2017).

6 Stixrude, L. & Lithgow-Bertelloni, C. Thermodynamics of mantle minerals—I. Physical properties. *Geophys J Int* **162**, 610-632 (2005).

7 Karki, B. *et al.* Elastic properties of orthorhombic MgSiO3 perovskite at lower mantle pressures. *Am Mineral* **82**, 635-638 (1997).

8 Li, L. *et al.* Elasticity of (Mg,Fe)(Si,Al)O3-perovskite at high pressure. *Earth Planet Sc Lett* **240**, 529-536 (2005).

9 Kurnosov, A., Marquardt, H., Frost, D., Ballaran, T. B. & Ziberna, L. Evidence for a Fe3+-rich pyrolitic lower mantle from (Al, Fe)-bearing bridgmanite elasticity data. *Nature* **543**, 543-546 (2017).

10 Lin, J.-F., Mao, Z., Yang, J. & Fu, S. Elasticity of lower-mantle bridgmanite. *Nature* **564**, E18-E26, doi:10.1038/s41586-018-0741-7 (2018).

11 Yeganeh-Haeri, A. Synthesis and re-investigation of the elastic properties of single-crystal magnesium silicate perovskite. *Phys Earth Planet In* **87**, 111-121 (1994).

12 Fukui, H. *et al.* Effect of cation substitution on bridgmanite elasticity: A key to interpret seismic anomalies in the lower mantle. *Sci Rep-Uk* **6**, 33337 (2016).

13 Akaogi, M. & Ito, E. Heat-Capacity of MgSiO3 Perovskite. *Geophys Res Lett* **20**, 105-108, doi:Doi 10.1029/92gl02655 (1993).

14 Akaogi, M., Kojitani, H., Morita, T., Kawaji, H. & Atake, T. Low-temperature heat capacities, entropies and high-pressure phase relations of MgSiO 3 ilmenite and perovskite. *Phys Chem Miner* **35**, 287-297 (2008).

15 Chantel, J., Frost, D. J., McCammon, C. A., Jing, Z. C. & Wang, Y. B. Acoustic velocities of pure and iron-bearing magnesium silicate perovskite measured to 25 GPa and 1200 K. *Geophys Res Lett* **39**, doi:Artn L19307 10.1029/2012gl053075 (2012).

16 Lundin, S. *et al.* Effect of Fe on the equation of state of mantle silicate perovskite over 1 Mbar. *Phys Earth Planet In* **168**, 97-102, doi:10.1016/j.pepi.2008.05.002 (2008).

17 Murakami, M., Ohishi, Y., Hirao, N. & Hirose, K. A perovskitic lower mantle inferred from high-pressure, high-temperature sound velocity data. *Nature* **485**, 90-94, doi:10.1038/nature11004 (2012).

18 Jackson, J. M., Zhang, J., Shu, J., Sinogeikin, S. V. & Bass, J. D. High‐pressure sound velocities and elasticity of aluminous MgSiO3 perovskite to 45 GPa: Implications for lateral heterogeneity in Earth's lower mantle. *Geophys Res Lett* **32** (2005).

19 Kurnosov, A., Marquardt, H., Frost, D., Ballaran, T. B. & Ziberna, L. Evidence for a Fe3+-rich pyrolitic lower mantle from (Al, Fe)-bearing bridgmanite elasticity data. *Nature* (2017).

20 Murakami, M., Sinogeikin, S. V., Hellwig, H., Bass, J. D. & Li, J. Sound velocity of MgSiO3 perovskite to Mbar pressure. *Earth Planet Sc Lett* **256**, 47-54 (2007).

21 Li, B. S. & Zhang, J. Z. Pressure and temperature dependence of elastic wave velocity of MgSiO3 perovskite and the composition of the lower. *Phys Earth Planet In* **151**, 143-154, doi:10.1016/j.pepi.2005.02.004 (2005).

22 Speziale, S., Zha, C. S., Duffy, T. S., Hemley, R. J. & Mao, H. k. Quasi‐hydrostatic compression of magnesium oxide to 52 GPa: Implications for the pressure‐volume‐temperature equation of state. *Journal of Geophysical Research: Solid Earth* **106**, 515-528 (2001).

23 Yang, J. *et al.* Elasticity of ferropericlase and seismic heterogeneity in the Earth's lower mantle. *Journal of Geophysical Research: Solid Earth* (2016).

24 Yang, J., Tong, X. Y., Lin, J. F., Okuchi, T. & Tomioka, N. Elasticity of Ferropericlase across the Spin Crossover in the Earth's Lower Mantle. *Sci Rep-Uk* **5** (2015).

25 Marquardt, H., Speziale, S., Reichmann, H. J., Frost, D. J. & Schilling, F. R. Single-crystal elasticity of (Mg0.9Fe 0.1)O to 81 GPa. *Earth Planet Sc Lett* **287**, 345-352 (2009).

26 Fei, Y. W. *et al.* Spin transition and equations of state of (Mg,Fe)O solid solutions. *Geophys Res Lett* **34**, doi:Artn L17307 (2007).

27 Mao, Z., Lin, J. F., Liu, J. & Prakapenka, V. B. Thermal equation of state of lower-mantle ferropericlase across the spin crossover. *Geophys Res Lett* **38**, doi:Artn L23308 (2011).

28 Fan, D. *et al.* Elasticity of single-crystal periclase at high pressure and temperature: The effect of iron on the elasticity and seismic parameters of ferropericlase in the lower mantle. *American Mineralogist: Journal of Earth and Planetary Materials* **104**, 262-275 (2019).

29 Wu, Z. Q., Justo, J. F. & Wentzcovitch, R. M. Elastic Anomalies in a Spin-Crossover System: Ferropericlase at Lower Mantle Conditions. *Phys Rev Lett* **110**, doi:Artn 228501 (2013).

30 Gréaux, S. *et al.* Sound velocity of CaSiO3 perovskite suggests the presence of basaltic crust in the Earth’s lower mantle. *Nature* **565**, 218 (2019).

31 Thomson, A. R. *et al.* Seismic velocities of CaSiO3 perovskite can explain LLSVPs in Earth’s lower mantle. *Nature*, doi:10.1038/s41586-019-1483-x (2019).

32 Sun, N. *et al.* Confirming a pyrolitic lower mantle using self‐consistent pressure scales and new constraints on CaSiO3 perovskite. *Journal of Geophysical Research: Solid Earth* **121**, 4876-4894 (2016).

33 Kawai, K. & Tsuchiya, T. Small shear modulus of cubic CaSiO3 perovskite. *Geophys Res Lett* **42**, 2718-2726 (2015).

34 Li, L. *et al.* Elasticity of CaSiO3 perovskite at high pressure and high temperature. *Phys Earth Planet In* **155**, 249-259, doi:10.1016/j.pepi.2005.12.006 (2006).

35 Wolf, A. S., Jackson, J. M., Dera, P. & Prakapenka, V. B. The thermal equation of state of (Mg, Fe)SiO3 bridgmanite (perovskite) and implications for lower mantle structures. *J Geophys Res-Sol Ea* **120**, 7460-7489, doi:10.1002/2015JB012108 (2015).

36 Tange, Y., Kuwayama, Y., Irifune, T., Funakoshi, K. i. & Ohishi, Y. P‐V‐T equation of state of MgSiO3 perovskite based on the MgO pressure scale: A comprehensive reference for mineralogy of the lower mantle. *Journal of Geophysical Research: Solid Earth* **117** (2012).

37 Lekić, V., Matas, J., Panning, M. & Romanowicz, B. Measurement and implications of frequency dependence of attenuation. *Earth Planet Sc Lett* **282**, 285-293 (2009).

38 Irifune, T. *et al.* Iron partitioning and density changes of pyrolite in Earth’s lower mantle. *Science* **327**, 193-195 (2010).

39 Xu, S., Lin, J. F. & Morgan, D. Iron partitioning between ferropericlase and bridgmanite in the Earth's lower mantle. *Journal of Geophysical Research: Solid Earth* **122**, 1074-1087 (2017).

40 Xu, S., Lin, J. F. & Morgan, D. Iron partitioning between ferropericlase and bridgmanite in the Earth's lower mantle. *Journal of Geophysical Research: Solid Earth* (2017).

41 Dziewonski, A. M. & Anderson, D. L. Preliminary Reference Earth Model. *Phys Earth Planet In* **25**, 297-356, doi:Doi 10.1016/0031-9201(81)90046-7 (1981).

42 Higo, Y., Inoue, T., Irifune, T., Funakoshi, K.-i. & Li, B. Elastic wave velocities of (Mg0. 91Fe0. 09) 2SiO4 ringwoodite under P–T conditions of the mantle transition region. *Phys Earth Planet In* **166**, 167-174 (2008).

43 Irifune, T. *et al.* Sound velocities of majorite garnet and the composition of the mantle transition region. *Nature* **451**, 814-817 (2008).

44 Kennett, B. L. N., Engdahl, E. R. & Buland, R. Constraints on Seismic Velocities in the Earth from Travel-Times. *Geophys J Int* **122**, 108-124, doi:DOI 10.1111/j.1365-246X.1995.tb03540.x (1995).

45 Irifune, T. & Ringwood, A. Phase transformations in a harzburgite composition to 26 GPa: implications for dynamical behaviour of the subducting slab. *Earth Planet Sc Lett* **86**, 365-376 (1987).

46 Ringwood, A. E. *Composition and petrology of the earth's mantle [by] AE Ringwood*. (1975).

47 Anderson, D. L. & Bass, J. D. Mineralogy and composition of the upper mantle. *Geophys Res Lett* **11**, 637-640 (1984).

48 Bass, J. D. & Anderson, D. L. Composition of the upper mantle: Geophysical tests of two petrological models. *Geophys Res Lett* **11**, 229-232 (1984).

49 Weidner, D. J. & Wang, Y. Chemical‐and Clapeyron‐induced buoyancy at the 660 km discontinuity. *Journal of Geophysical Research: Solid Earth* **103**, 7431-7441 (1998).

50 Yamazaki, D. & Karato, S.-i. Some mineral physics constraints on the rheology and geothermal structure of Earth’s lower mantle. *Am Mineral* **86**, 385-391 (2001).

51 Takeda, Y.-T. Flow in rocks modelled as multiphase continua: Application to polymineralic rocks. *Journal of Structural Geology* **20**, 1569-1578 (1998).

52 Fu, S. *et al.* Abnormal Elasticity of Fe‐Bearing Bridgmanite in the Earth's Lower Mantle. *Geophys Res Lett* **45**, 4725-4732, doi:doi:10.1029/2018GL077764 (2018).

53 Murakami, M., Ohishi, Y., Hirao, N. & Hirose, K. A perovskitic lower mantle inferred from high-pressure, high-temperature sound velocity data. *J Geol Soc India* **80**, 147-147, doi:10.1007/s12594-012-0111-2 (2012).

54 Shim, S.-H. & Duffy, T. S. Constraints on the PVT equation of state of MgSiO3 perovskite. *Am Mineral* **85**, 354-363 (2000).

55 Fiquet, G., Dewaele, A., Andrault, D., Kunz, M. & Le Bihan, T. Thermoelastic properties and crystal structure of MgSiO3 perovskite at lower mantle pressure and temperature conditions. *Geophys Res Lett* **27**, 21-24, doi:Doi 10.1029/1999gl008397 (2000).
